# Supplementary material
Source: Copernicus journal article supplement (doi:10.5194/acp-26-5375-2026)
Supplement: Supplementary file 1 [file acp-26-5375-2026-supplement.pdf]

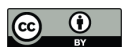

*Supplement of*

## **Global atmospheric methanol emissions inferred from IASI satellite measurements and aircraft data**

**Jean-François Müller et al.**

*Correspondence to:* Jean-François Müller ([jfm@aeronomie.be](mailto:jfm@aeronomie.be))

The copyright of individual parts of the supplement might differ from the article licence.

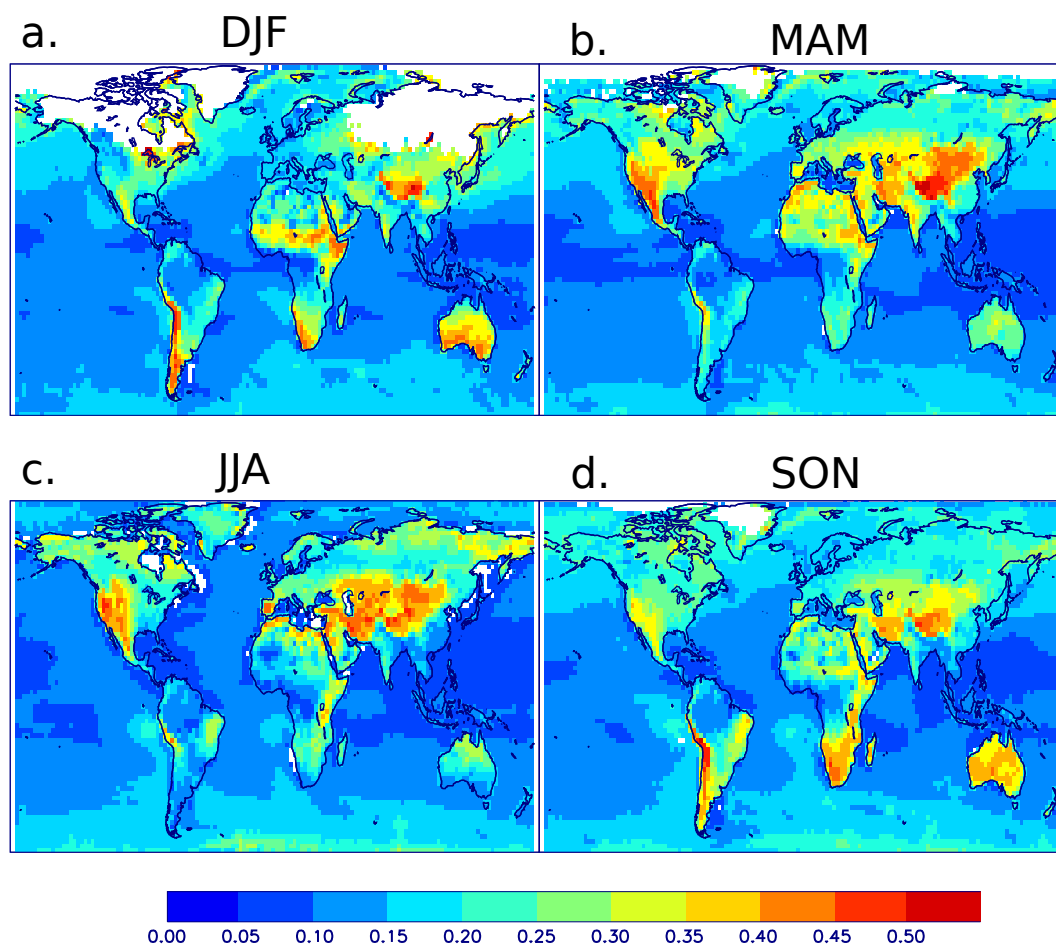

**Figure S1.** Seasonally-averaged distribution of the IASI total column averaging kernel at the first IASI grid layer (0–0.14 km altitude). Average over 2008–2019.

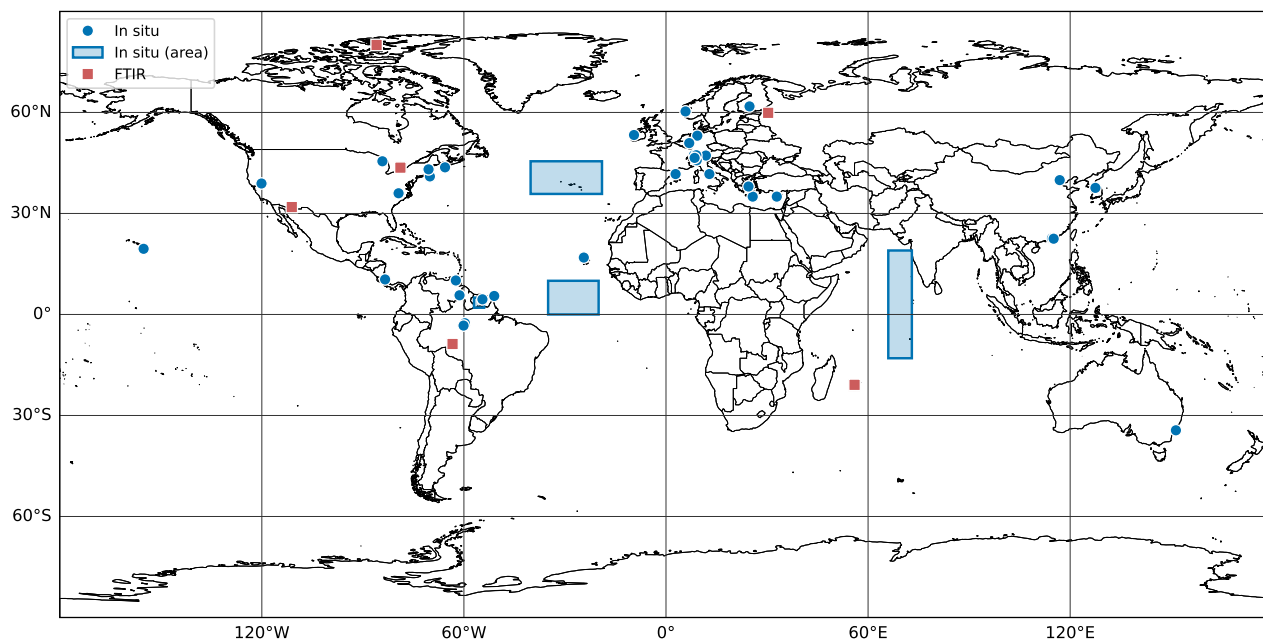

**Figure S2.** Location of in situ CH<sub>3</sub>OH measurement sites used for model evaluation (blue dots and blue boxes), presented in Tables S1 and S2. Red squares correspond to the location of FTIR measurement sites, Eureka (80.05 N, 273.58 E), Saint Petersburg (59.88 N, 29.83 E), Toronto (43.6 N, 280.64 E), Jungfrauoch (46.55 N, 7.98 E), Kitt Peak (31.9 N, 248.4 E), Porto Velho (8.77 S, 296.13 E), Saint-Denis, Reunion Isl. (20.90 S, 55.49 E), and Maïdo Observatory, Reunion Isl. (21.08 S, 55.38 E).

**Table S1.** In situ CH<sub>3</sub>OH mixing ratio measurements (pptv), and corresponding model values from the a priori run and IASI-based inversion. Obs.: average from observation. A priori and optimised model values are averages calculated for the year and months of the measurement campaign when simulations are available for that year, otherwise a climatology is calculated using all simulated years (2008-2019).

| Site                          | Coordinates      | Month | Obs. | A priori | Optimised | Reference                   |
|-------------------------------|------------------|-------|------|----------|-----------|-----------------------------|
| <i>Tropical forests</i>       |                  |       |      |          |           |                             |
| Malaysian rainforest (2008)   | 5.0 N, 117.8 E   | 4-5   | 1200 | 2797     | 1396      | Langford et al. (2010)      |
| Malaysian rainforest (2008)   | 5.0 N, 117.8 E   | 6-7   | 1500 | 2314     | 1481      | Langford et al. (2010)      |
| Suriname trop. forest (2005)  | 4.5 N, 305.0 E   | 10    | 1890 | 2615     | 1773      | Lelieveld et al. (2008)     |
| Rondonia, Brazil (1999)       | 10.1 S, 297.1 E  | 10    | 2500 | 5164     | 5962      | Kesselmeier et al. (2002)   |
| Suriname rainforest (1998)    | 2-5 N, 303-306 E | 3     | 1100 | 1782     | 1263      | Williams et al. (2001)      |
| Central Amazonia (2004)       | 2.6 S, 299.8 E   | 9     | 4100 | 5700     | 4738      | Karl et al. (2007)          |
| Parupa, Venezuela (1999)      | 5.7 N, 298.2 E   | 1-2   | 1540 | 2053     | 1397      | Sanhueza et al. (2001)      |
| La Selva, Costa Rica (2003)   | 10.4 N, 276.1 E  | 4-5   | 2155 | 1912     | 1467      | Karl et al. (2004)          |
| Manacapuru, Brazil (2014)     | 3.3 S, 299.4 E   | 2     | 1778 | 3015     | 2148      | Seco et al. (2014)          |
| Manacapuru, Brazil (2014)     | id.              | 3     | 1261 | 3197     | 2447      | Seco et al. (2014)          |
| <i>North America</i>          |                  |       |      |          |           |                             |
| Blodgett Forest, USA (2000)   | 38.9 N, 239.4 E  | 6     | 3650 | 2557     | 3880      | Schade and Goldstein (2006) |
| id.                           | id.              | 9-11  | 3440 | 1632     | 2073      | id.                         |
| id.                           | id.              | 12-1  | 970  | 985      | 1145      | id.                         |
| id. (2001)                    | id.              | 3     | 1900 | 1268     | 1929      | id.                         |
| Appledore Isl., USA (2004)    | 41 N, 289.4 E    | 7-8   | 2100 | 3129     | 3900      | Mao et al. (2006)           |
| Duke Forest, USA (2003)       | 36 N, 280.1 E    | 7     | 5000 | 6854     | 7184      | Karl et al. (2005)          |
| Chebogue Point, Canada (2004) | 43.7 N, 293.9 E  | 7-8   | 1389 | 2134     | 3281      | Millet et al. (2006)        |
| UMBS, Michigan, USA (2001)    | 45.5 N, 275.3 E  | 9-10  | 3530 | 1359     | 2233      | Karl et al. (2003)          |
| UMBS, Michigan, USA (2002)    | id.              | 6     | 6800 | 4046     | 6343      | id.                         |
| UMBS, Michigan, USA (2005)    | id.              | 7-8   | 8050 | 3732     | 5853      | id.                         |
| Durham, USA (2005-2007)       | 43.1 N, 289.0 E  | 12-2  | 1200 | 863      | 1040      | Jordan et al. (2009)        |
| Durham, USA (2006-2008)       | id.              | 3-5   | 2170 | 1952     | 3693      | id.                         |
| Durham, USA (2004-2007)       | id.              | 6-8   | 3350 | 4571     | 6657      | id.                         |
| Durham, USA (2005-2007)       | id.              | 9-11  | 1370 | 1425     | 2004      | id.                         |

Table S1. Continued.

| Site                              | Coordinates                | Month | Obs.  | A priori | Optimised | Reference                   |
|-----------------------------------|----------------------------|-------|-------|----------|-----------|-----------------------------|
| <i>Europe</i>                     |                            |       |       |          |           |                             |
| Bremen Campus, Germany (2004)     | 53.1 N, 8.8 E              | 7     | 2200  | 2947     | 4606      | Solomon et al. (2005)       |
| Juelich, Germany (2003)           | 50.9 N, 6.4 E              | 7     | 8000  | 4140     | 5525      | Spirig et al. (2005)        |
| Innsbruck, Austria (1997)         | 47.2 N, 11.35 E            | 9     | 3000  | 2017     | 2360      | Holzinger et al. (2001)     |
| Castelporziano, Italy (2007)      | 41.7 N, 12.38 E            | 5     | 3510  | 2453     | 3497      | Davison et al. (2009)       |
| Northern Italy (2013)             | 45.8 N, 8.63 E             | 6     | 6220  | 4513     | 6305      | Jensen et al. (2018)        |
| Creta, Greece (2001)              | 35 N, 25.25 E              | 8     | 3500  | 2047     | 1840      | de Gouw et al. (2004)       |
| Cyprus (2014)                     | 35 N, 32.4 E               | 7-8   | 3242  | 1731     | 1657      | Derstroff et al. (2017)     |
| Athens, Greece (2001)             | 38 N, 24 E                 | 8     | 4500  | 3181     | 2791      | de Gouw et al. (2004)       |
| Raunefjord, Norway (2005)         | 60.3 N, 5.3 E              | 6     | 1860  | 1064     | 1470      | Sinha et al. (2007)         |
| Central Switzerland (2004)        | 47.3 N, 7.8 E              | 7     | 6000  | 3694     | 4187      | Brunner et al. (2007)       |
| Zurich, Switzerland (2005)        | 47.3 N, 8.5 E              | 4     | 2180  | 2942     | 5388      | Legreid et al. (2007)       |
| id.                               | id.                        | 7     | 3180  | 3716     | 4173      | id.                         |
| id.                               | id.                        | 11    | 1110  | 1431     | 1521      | id.                         |
| id.                               | id.                        | 12    | 1210  | 1481     | 1577      | id.                         |
| Jungfrauoch, Switzerland (2005)   | 46.5 N, 8 E                | 4-5   | 790   | 827      | 1312      | Legreid et al. (2008)       |
| id.                               | id.                        | 8-9   | 769   | 794      | 966       | id.                         |
| id.                               | id.                        | 10    | 362   | 456      | 532       | id.                         |
| id.                               | id.                        | 2-3   | 550   | 358      | 400       | id.                         |
| Montseny, Spain (2009)            | 41.7 N, 2.35 E             | 2-3   | 1840  | 832      | 1053      | Seco et al. (2011)          |
| id.                               | id.                        | 7-8   | 4920  | 2349     | 1823      | id.                         |
| Montseny, Spain (2019)            | 41.7 N, 2.35 E             | 7-8   | 4600  | 2800     | 2712      | Yanez-Serrano et al. (2021) |
| id.                               | id.                        | 9     | 1990  | 1810     | 1809      | id.                         |
| id.                               | id.                        | 10    | 1600  | 1335     | 1558      | id.                         |
| Hyytiälä forest, Finland (2007)   | 61.8 N, 24.3 E             | 1     | 190   | 476      | 500       | Patokoski et al. (2014)     |
| id.                               | id.                        | 4     | 640   | 887      | 1248      | id.                         |
| <i>Other</i>                      |                            |       |       |          |           |                             |
| Shenzhen, China (2022)            | 22.6 N, 114 E              | 9-10  | 3700  | 4324     | 3005      | Li et al. (2024)            |
| Yangmeikeng, China (2016)         | 22.5 N, 114.6 E            | 6-7   | 3900  | 3411     | 2463      | Han et al. (2019)           |
| Seoul, South Korea (2016)         | 37.6 N, 127 E              | 5-6   | 11500 | 3908     | 9246      | Beaudry et al. (2025)       |
| Beijing, China (2017)             | 39.9 N, 116.4 E            | 5-6   | 16500 | 4626     | 17234     | id.                         |
| Indian Ocean, 0-13 S (1999)       | 0-13 S, 71-73 E            | 3     | 600   | 642      | 635       | Wisthaler et al. (2002)     |
| Indian Ocean, 9-13 N (1999)       | 9-13 N, 67-70 E            | 3     | 1057  | 833      | 931       | id.                         |
| Indian Ocean, 13-19 N (1999)      | 13-19 N, 66-70 E           | 3     | 687   | 716      | 794       | id.                         |
| Indian Ocean, 7.5 N (1999)        | 7.5 N, 70 E                | 3     | 1417  | 917      | 968       | id.                         |
| Atlantic, 1.7±1.3 km (2004)       | 35.8–40.2 N, 321.4–332.6 E | 7-8   | 530   | 527      |           | Lewis et al. (2007)         |
| Atlantic, 2.4±1.4 km              | 36–44 N, 326–338 E         | id.   | 630   | 544      | 659       | id.                         |
| Atlantic, 3.5±1.7 km              | 40.5–45.5 N, 325–335 E     | id.   | 1100  | 598      | 815       | id.                         |
| Atlantic, 6.1±1.9 km              | 36.5–43.5 N, 323–341 E     | id.   | 680   | 543      | 752       | id.                         |
| Atlantic, 6.7±2.3 km              | 36.1–41.9 N, 319.8–334.2 E | id.   | 380   | 540      | 723       | id.                         |
| Mauna Loa, Pacific (2001)         | 19.5 N, 204.4 E            | 3-4   | 900   | 627      | 635       | Karl et al. (2003a)         |
| Tropical Atlantic (2002)          | 0-10 N, 325-340 E          | 10-11 | 890   | 935      | 804       | Williams et al. (2004)      |
| Mace Head, Ireland (2002)         | 53.3 N, 350 E              | 7-9   | 802   | 729      | 957       | Lewis et al. (2005)         |
| Cape Verde (2006-2011)            | 16.9 N, 335.1 E            | 1-12  | 742   | 519      | 524       | Read et al. (2012)          |
| Maido, Reunion Isl. (2017-2019)   | 21.1 S, 55.4 E             | 1-12  | 961   | 498      | 513       | Verreyken et al. (2021)     |
| Wollongong, Australia (2012-2013) | 34.4 S, 150.9 E            | 12-2  | 2234  | 1649     | 1718      | Paton-Walsh et al. (2017)   |

**Table S2.** FTIR stations contributing in this work: longitude, latitude, altitude above sea level, microwindows, database for spectroscopy, and reference.

| Station                | Latitude North | Longitude East | Altitude (km) | Microwindow (cm <sup>-1</sup> ) | Spectroscopy database | Reference                                         |
|------------------------|----------------|----------------|---------------|---------------------------------|-----------------------|---------------------------------------------------|
| Eureka                 | 80.05          | -86.42         | 0.61          | 992.0–998.7;<br>1029.0–1037.0   | HITRAN 2008           | Viatte et al. (2014),<br>Wizenberg et al. (2024)  |
| St. Petersburg         | 59.88          | 29.83          | 0.02          | 992.0–998.7;<br>1029.0–1037.0   | HITRAN 2016           | Viatte et al. (2014)                              |
| Jungfrauoch            | 46.550         | 7.98           | 3.58          | 992.0–998.7;<br>1029.0–1037.0   | HITRAN 2008           | Bader et al. (2014)                               |
| Toronto                | 43.60          | -79.40         | 0.17          | 992.0–998.7;<br>1029.0–1037.0   | HITRAN 2008           | Viatte et al. (2014),<br>Yamanouchi et al. (2023) |
| Kitt Peak Obs.         | 31.90          | -111.60        | 2.09          | 992.0–998.7                     | HITRAN 2004           | Rinsland et al. (2009)                            |
| Porto Velho            | -8.77          | -63.87         | 0.09          | 1029.0–1037.0                   | HITRAN 2012           | Vigouroux et al. (2012)                           |
| La Réunion (St. Denis) | -20.90         | 55.48          | 0.08          | 1029.0–1037.0                   | HITRAN 2012           | Vigouroux et al. (2012)                           |
| La Réunion (Maïdo)     | -21.08         | 55.38          | 2.16          | 1029.0–1037.0                   | HITRAN 2012           | Vigouroux et al. (2012)                           |

**Table S3.** Methanol dry deposition velocity measurements used in this work for evaluation. LAI is the reported leaf area index (m<sup>2</sup> m<sup>-2</sup>), when available,  $v_d^{obs}$  and  $v_d^{mod}$  the average measured and modelled deposition velocity, respectively. PFT is the the plant functional type. Notes: \*: nighttime; *a*: variable, provided by the MODIS dataset. References: 1, Wohlfahrt et al. (2015); 2, Schade and Goldstein (2001); 3, Karl et al. (2005); 4, Rantala et al. (2015); 5, Schade et al. (2011); 6, McKinney et al. (2011); 7, Schallhart et al. (2006); 8, Seco et al. (2015); 9, Langford et al. (2010); 10, Misztal et al. (2011); 11, Holst et al. (2010); 12, Brunner et al. (2007); 13, Hörtnagl et al. (2011).

| Site                          | Dominant PFT      | Coordinates       | Month(s)/year(s) | LAI      | $v_d^{obs}$ ( $v_d^{mod}$ ) | Reference |
|-------------------------------|-------------------|-------------------|------------------|----------|-----------------------------|-----------|
| Blodgett, USA                 | pine plantation   | 38.8 N, 239.3 E   | 6-7/1999         | 1.5      | 1.8* (1.45)                 | 1, 2      |
| Duke forest, USA              | pine plantation   | 35.98 N, 280.9 E  | 7/2003           | 3        | 0.96* (0.86)                | 3         |
| Vielsalm, Belgium             | mostly coniferous | 50.3 N, 5.99 E    | 3-11/2009-11     | 3.5      | 1.9* (1.52)                 | 1         |
| Hyytiälä, Finland             | coniferous        | 61.8 N, 24.3 E    | 5-9/2010-13      | 6        | 0.29 (1.34)                 | 4         |
| Soroe, Denmark                | beech forest      | 55.4 N, 11.7 E    | 6/2007           | 5        | 1.1 (0.75)                  | 5         |
| Harvard forest, USA           | mixed forest      | 42.54 N, 287.83 E | 6-7/2007         | 5        | 1.0* (0.72)                 | 1, 6      |
| Bosco Fontana, Italy          | oak forest        | 45.2 N, 10.74 E   | 6-8/2012         | 3.5      | 0.21* (0.22)                | 7         |
| Ozarks, USA                   | deciduous         | 38.76 N, 267.84 E | 5-10/2012        | <i>a</i> | 0.3* (0.44)                 | 1, 8      |
| Bukit Atur, Borneo            | rainforest        | 4.9 N, 117.8 E    | 4-7/2008         | 6        | 0.47 (0.76)                 | 9         |
| Borneo plantation             | palm trees        | 5.2 N, 118.4 E    | 5-6/2008         | 6        | 1.25 (0.76)                 | 10        |
| Stordalen, Sweden             | wetland           | 68.33 N, 19.05 E  | 5-9/2007         | <i>a</i> | 0.70* (0.42)                | 1, 11     |
| Oesingen, Switzerland         | grassland         | 47.28 N, 7.73 E   | 6-7/2004         | <i>a</i> | 0.15* (0.14)                | 1, 12     |
| Neustift, Austria             | grassland         | 47.12 N, 11.32 E  | 3-11/2008-12     | <i>a</i> | 0.50* (0.46)                | 13        |
| <i>Average over all sites</i> |                   |                   |                  |          | <i>0.82 (0.76)</i>          |           |

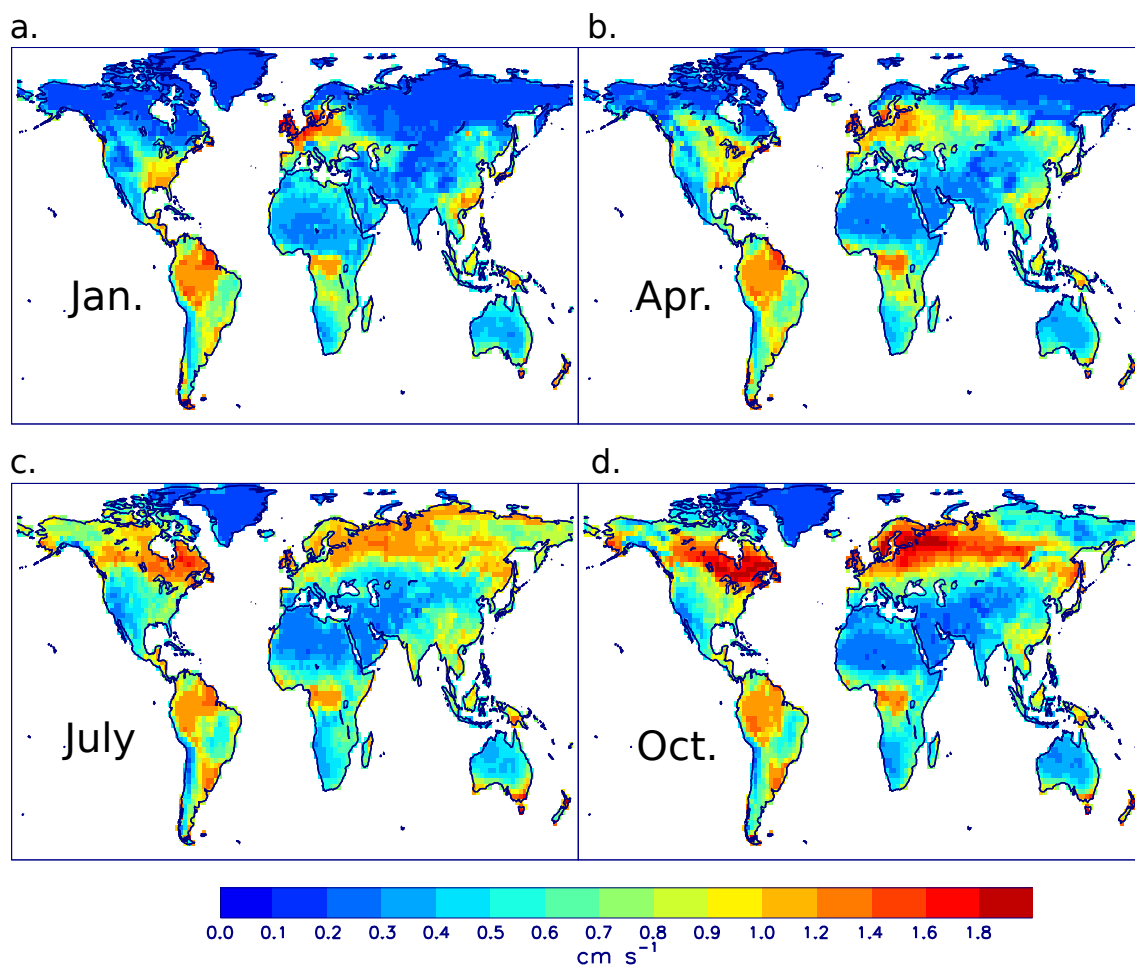

**Figure S3.** Climatological (2008–2019) monthly methanol dry deposition velocities at  $2^\circ \times 2.5^\circ$  ( $\text{cm s}^{-1}$ ) over land areas, for (a) January, (b) April, (c) July and (d) October.

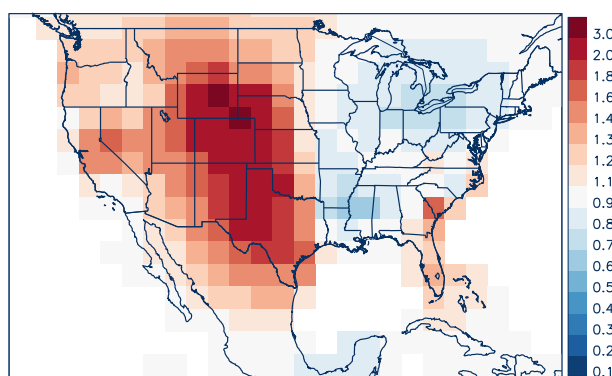

**Figure S4.** Enhancement of summertime biogenic emissions (May–September 2012–2013 average), relative to the a priori inventory, obtained in the aircraft-based optimisation.

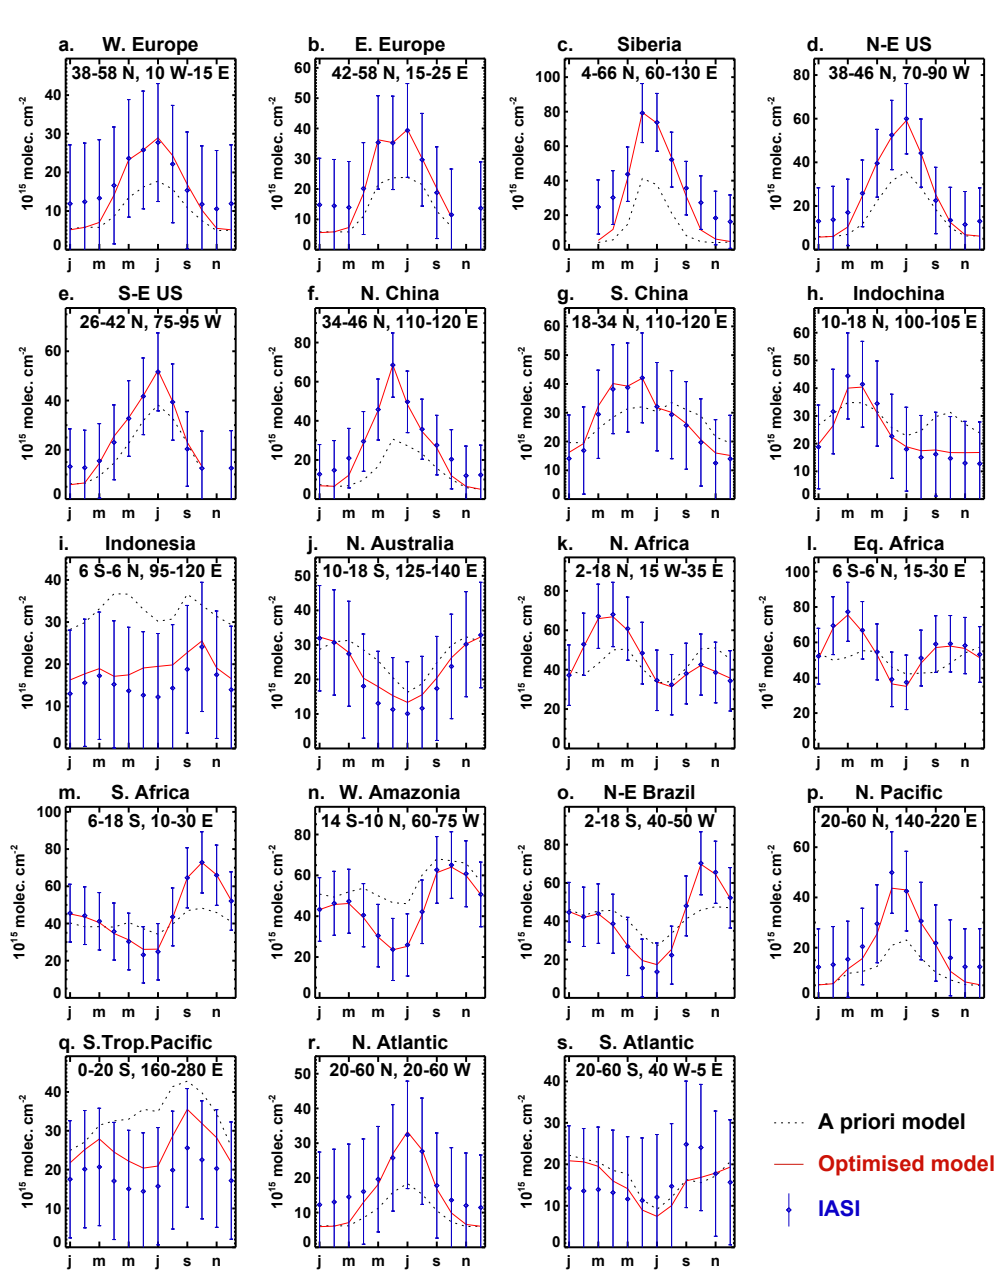

**Figure S5.** Seasonal variation (2008–2019 average) of  $\text{CH}_3\text{OH}$  columns ( $10^{15} \text{ molec. cm}^{-2}$ ) over large regions. Symbols: bias-corrected IASI; dotted line: model with a priori emissions; red line: and optimised emissions (red line). Error bars denote the combined observational and model error adopted in the emission inversion.

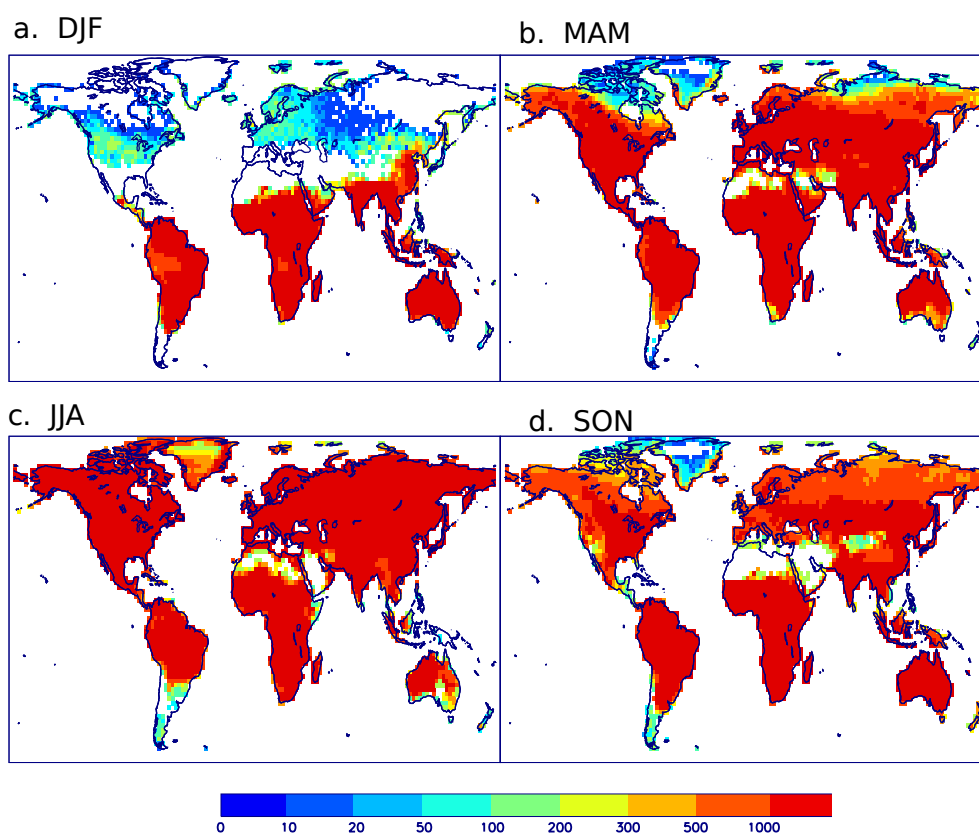

**Figure S6.** Average number of IASI measurements per pixel and per season used in the emission optimisations, on average between 2008 and 2019.

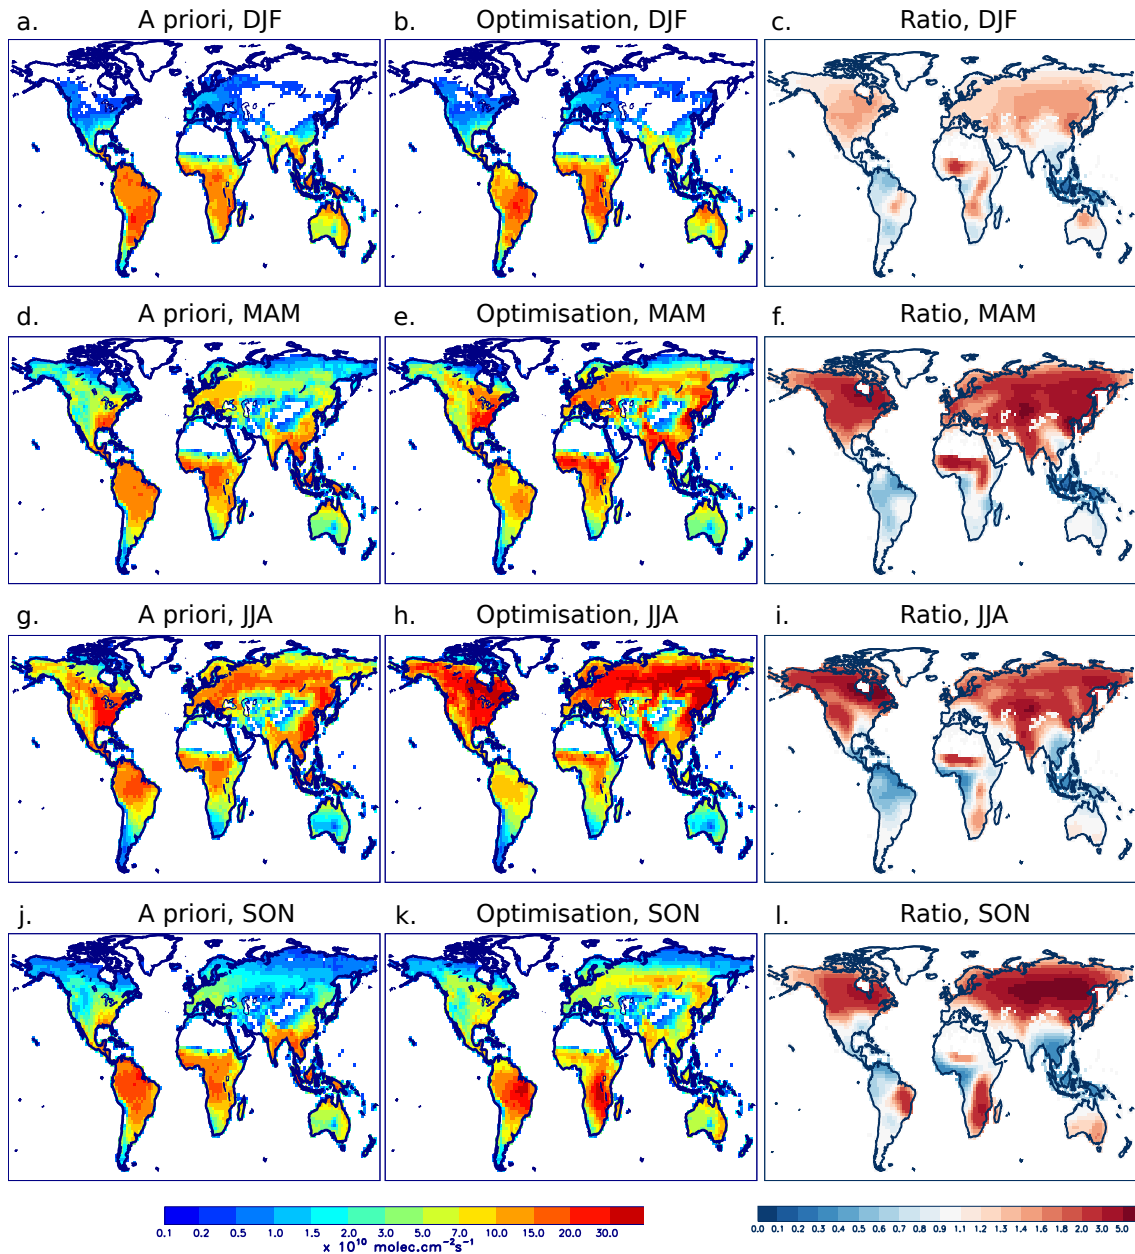

**Figure S7.** Seasonally-averaged biogenic emissions (2008-2019 averages in  $10^{10} \text{ molec.cm}^{-2} \text{ s}^{-1}$ ) in the a priori simulation (left panels) and in the optimisation (middle panels). The ratio of optimised to priori emissions is displayed on the right panels..)

**Table S4.** Statistics of comparison of in situ CH<sub>3</sub>OH measurements from aircraft campaigns with model runs using either a priori emissions or emissions constrained by IASI.  $n$  is the number of measurements. The bias is calculated as  $100 \cdot (\langle C_m - C_o \rangle) / \langle C_o \rangle$ , with  $C_m$  and  $C_o$  the modelled and observed mixing ratios, respectively, and  $\langle \rangle$  denote the average over all data from each campaign. The root-mean-square deviation (RMSD) is calculated as  $(\langle (C_m - C_o)^2 \rangle)^{1/2}$ . Only data below 8 km altitude are considered. Data over ocean are excluded from all campaigns except ATom. See main manuscript for additional details on the campaigns.

|                                | $n$          | $C_o$<br>(ppbv) | Bias<br>A priori (%) | Bias<br>Optimised (%) | RMSD<br>A priori (ppbv) | RMSD<br>Optimised (ppbv) |
|--------------------------------|--------------|-----------------|----------------------|-----------------------|-------------------------|--------------------------|
| ARCTAS June (PTR-MS)           | 1612         | 2.67            | -36                  | -15                   | 1.23                    | 0.74                     |
| ARCTAS June (TOGA)             | 1369         | 2.23            | -24                  | 2                     | 0.83                    | 0.60                     |
| ARCTAS July (PTR-MS)           | 1773         | 2.67            | -24                  | 49                    | 0.93                    | 2.11                     |
| ARCTAS July (TOGA)             | 1463         | 2.89            | -23                  | 51                    | 1.47                    | 2.80                     |
| DC3 (DC8)                      | 2847         | 3.19            | -45                  | -29                   | 1.66                    | 1.15                     |
| DC3 (GV)                       | 2055         | 3.28            | -50                  | -34                   | 1.83                    | 1.30                     |
| SENEX                          | 6273         | 5.29            | -23                  | -22                   | 1.26                    | 1.23                     |
| SEAC <sup>4</sup> RS           | 4732         | 2.85            | 0                    | -3                    | 0.50                    | 0.26                     |
| GoAmazon                       | 1765         | 1.55            | 32                   | 1                     | 0.71                    | 0.36                     |
| KORUS-AQ                       | 1057         | 6.08            | -77                  | -45                   | 5.07                    | 2.84                     |
| <i>All campaigns over land</i> | <i>24946</i> | <i>3.52</i>     | <i>-22.7</i>         | <i>-8.4</i>           | <i>1.29</i>             | <i>1.14</i>              |
|                                |              |                 | <i>Over ocean</i>    |                       |                         |                          |
| ATom 1-4                       | 3510         | 0.60            | -21                  | -15                   | 0.163                   | 0.130                    |

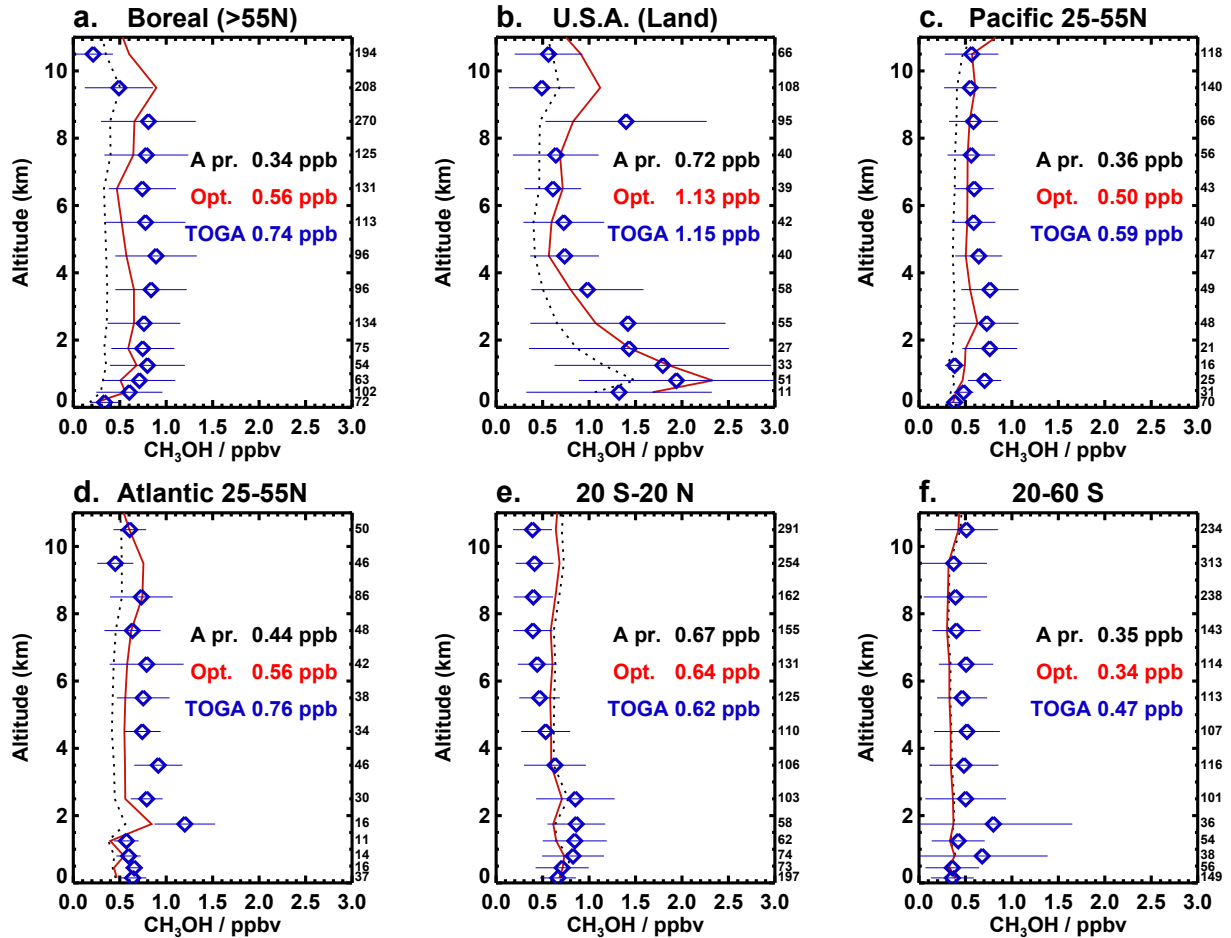

**Figure S8.** Averaged vertical profiles of observed  $\text{CH}_3\text{OH}$  concentrations (symbols) from the ATom campaigns (Fig. 2 and Table 2 of main manuscript) (a) poleward of  $55^\circ\text{N}$ , (b) over contiguous U.S., (c) N. Pacific ( $25\text{--}55^\circ\text{N}$ ), (d) N. Atlantic ( $25\text{--}55^\circ\text{N}$ ), (e) tropical oceans ( $20^\circ\text{--}20^\circ\text{N}$ ), and (f) southern oceans ( $20^\circ\text{S}\text{--}60^\circ\text{S}$ ). Dotted lines: prior model profiles; red lines: IASI-based optimisation. The error bars denote the standard deviation of the observations. The number of observations per altitude bin is indicated on the right of each plot. The average observed and modelled mixing ratios below 8 km altitude are given for each region. Data over land are excluded for all regions except for panels a and b.

**Table S5.** Summary of comparison between in situ CH<sub>3</sub>OH mixing ratio measurements and corresponding model values (in ppbv) before and after IASI-based emission optimisation, averaged over large regions. The measurement sites are detailed in Table S1.

|                  | Number of campaigns | Observed (ppbv) | A priori model (ppbv) | Optimisation (ppbv) | Ratio optimised/observed |
|------------------|---------------------|-----------------|-----------------------|---------------------|--------------------------|
| Tropical forests | 10                  | 1.77            | 2.76                  | 2.03                | 1.15                     |
| U.S.A.           | 14                  | 2.63            | 2.18                  | 3.09                | 1.17                     |
| Europe           | 25                  | 1.92            | 1.62                  | 1.90                | 0.99                     |
| East Asia        | 4                   | 7.23            | 4.04                  | 5.86                | 0.81                     |
| Marine           | 14                  | 0.77            | 0.64                  | 0.72                | 0.93                     |
| All              | 67                  | 2.12            | 1.85                  | 2.16                | 1.02                     |

**Table S6.** Statistics of the comparison between FTIR CH<sub>3</sub>OH column measurements and model simulations using either a priori or top-down emissions.  $n$  is the number of measurements. The bias (%) is calculated as  $100 \cdot \langle C_m - C_o \rangle / \langle C_o \rangle$ , where  $C_m$  and  $C_o$  denote the mean modelled and observed monthly columns, respectively, and  $\langle \rangle$  denote the average over all data from each station. The root-mean-square deviation (RMSD) is calculated as  $(\langle (C_m - C_o)^2 \rangle)^{1/2}$ .  $R$  denotes Pearson's correlation coefficient. For Porto Velho, the statistics are for the alternative optimisation ignoring IASI data between 13 and 30 September, 2019 (see text).

|                               | $n$  | $C_o$<br>( $10^{15} \text{ cm}^{-2}$ ) | Bias (%) |           | RMSD ( $10^{15} \text{ cm}^{-2}$ ) |           | $R$      |           |
|-------------------------------|------|----------------------------------------|----------|-----------|------------------------------------|-----------|----------|-----------|
|                               |      |                                        | A priori | Optimised | A priori                           | Optimised | A priori | Optimised |
| Eureka (2008–2019)            | 1920 | 20.8                                   | -70      | -40       | 14.9                               | 8.9       | 0.74     | 0.78      |
| Toronto (2008–2019)           | 1148 | 37.2                                   | -25      | 12        | 10.4                               | 8.8       | 0.90     | 0.88      |
| St Petersburg (2009–2019)     | 4861 | 21.0                                   | -20      | 21        | 6.4                                | 9.1       | 0.89     | 0.92      |
| Jungfraujoch (2008–2019)      | 2574 | 7.2                                    | -30      | -6        | 3.2                                | 1.7       | 0.82     | 0.90      |
| St Denis, Reunion (2009–2011) | 1312 | 12.0                                   | 5        | 4         | 2.6                                | 1.6       | 0.45     | 0.86      |
| Maïdo, Reunion (2013–2019)    | 4346 | 9.3                                    | 13       | 11        | 2.8                                | 1.9       | 0.36     | 0.82      |
| Porto Velho (June–Oct. 2019)  | 568  | 42.5                                   | 35       | 24        | 15.4                               | 14.8      | 1.00     | 0.95      |
| Kitt Peak (1985–2003)         | 86   | 9.6                                    | -22      | -12       | 3.3                                | 1.9       | 0.87     | 0.96      |

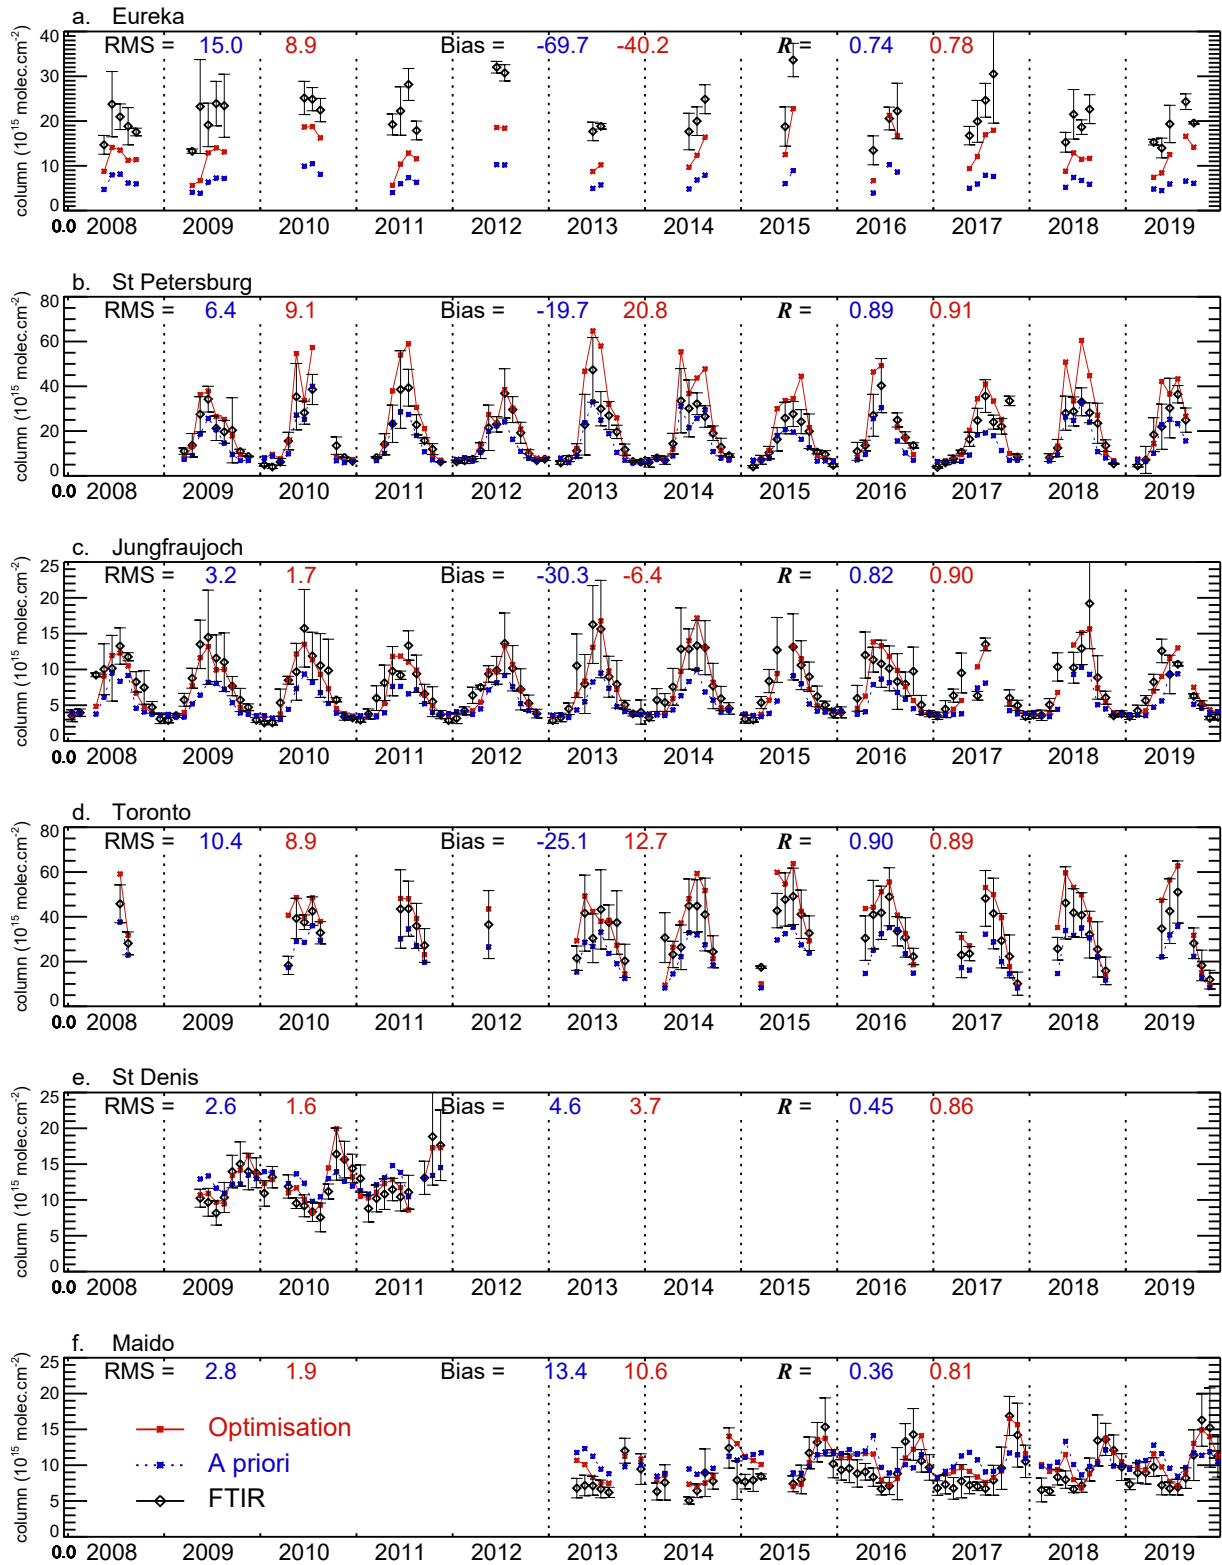

**Figure S9.** Time series of monthly averaged FTIR  $\text{CH}_3\text{OH}$  columns (black symbols) between 2008 and 2019, and corresponding model values from the a priori run (dotted dark blue lines) and optimised run (red lines), respectively. The model averages are calculated using the FTIR averaging kernels and model vertical profiles at the FTIR sampling times. Months for which the number of FTIR measurements is lower than three are excluded. The root mean squared deviation (RMS) and absolute bias ( $10^{15} \text{ molec. cm}^{-2}$ ), as well as Pearson's coefficient of correlation ( $R$ ) are also given. The error bars denote the standard deviation of the monthly averaged data.

**Table S7.** Plant functional types (PFT) and values of parameters involved in the dry deposition scheme. All resistance units are  $\text{s m}^{-1}$ .

| Plant functional types     | $a_s$<br>$\text{J m}^{-3}$ | $b_s$<br>$\text{J m}^{-2}$ | $c_s$ | $d_s$<br>$\text{hPa}^{-1}$ | $R_{ac0}^{\min}$ | $R_{ac0}^{\max}$ | $R_{\text{cutd}0}^{\text{O}_3}$ | $R_{\text{cutw}0}^{\text{O}_3}$ | $R_{\text{cut}}^{\text{SO}_2}$ | $R_{\text{gd}}^{\text{SO}_2}$ |
|----------------------------|----------------------------|----------------------------|-------|----------------------------|------------------|------------------|---------------------------------|---------------------------------|--------------------------------|-------------------------------|
| Needleleaf evergreen trees | 14000                      | 2                          | 18    | 0.031                      | 100              | 100              | 6000                            | 300                             | 2000                           | 200                           |
| Needleleaf deciduous trees | 14000                      | 2                          | 18    | 0.031                      | 60               | 100              | 6000                            | 300                             | 2000                           | 200                           |
| Broadleaf evergreen trees  | 4000                       | 6                          | 20    | 0.036                      | 250              | 250              | 9000                            | 600                             | 2500                           | 100                           |
| Broadleaf deciduous trees  | 10000                      | 5                          | 30    | 0.036                      | 100              | 250              | 9000                            | 600                             | 2500                           | 200                           |
| Shrub                      | 10000                      | 5                          | 30    | 0.031                      | 60               | 60               | 7500                            | 450                             | 2000                           | 200                           |
| Crop                       | 20000                      | 6                          | 90    | 0.0                        | 10               | 40               | 6000                            | 300                             | 1500                           | 200                           |
| Grass                      | 5000                       | 1                          | 50    | 0.024                      | 10               | 40               | 6000                            | 300                             | 1000                           | 200                           |

## References

- Bader, W., Stavrou, T., Müller, J.-F., Reimann, S., Boone, C. D., Harrison, J. J., Flock, O., Bovy, B., Franco, B., Lejeune, B., Servais, C., and Mahieu, E.: Long-term evolution and seasonal modulation of methanol above Jungfrauoch (46.5° N, 8.0° E): optimisation of the retrieval strategy, comparison with model simulations and independent observations, *Atmos. Meas. Tech.*, 7, 3861–3872, <https://doi.org/10.5194/amt-7-3861-2014>, 2014.
- Beaudry, E., D. J. Jacob, K. H. Bates, S. Zhai, L. H. Yang, D. C. Pendergrass, N. Colombi, I. J. Simpson, A. Wisthaler, J. R. Hopkins, K. Li, and H. Liao: Ethanol and methanol in South Korea and China: Evidence for large anthropogenic emissions missing from current inventories, *ACS ES&T Air*, 2, 456–465, <https://doi.org/10.1021/acsestair.4c00210>, 2025.
- Brunner, A., Ammann, C., Nefel, A., and Spirig, C.: Methanol exchange between grassland and the atmosphere, *Biogeosciences*, 4, 395–410, <https://doi.org/10.5194/bg-4-395-2007>, 2007.
- Davison, B., Taipale, R., Langford, B., Misztal, P., Fares, S., Matteucci, G., Loreto, F., Cape, J. N., Rinne, J., and Hewitt, C. N.: Concentrations and fluxes of biogenic volatile organic compounds above a Mediterranean macchia ecosystem in western Italy, *Biogeosciences*, 6, 1655–1670, <https://doi.org/10.5194/bg-6-1655-2009>, 2009.
- de Gouw, J., Warneke, C., Holzinger, R., Klupfel, T., and Williams, J.: Inter-comparison between airborne measurements of methanol, acetonitrile and acetone using two differently configured PTR-MS instruments, *Int. J. Mass Spectr.*, 239, 129–137, 2004.
- Derstroff, B., Hüser, I., Bourtsoukidis, E., Crowley, J. N., Fischer, H., Gromov, S., Harder, H., Janssen, R. H. H., Kesselmeier, J., Lelieveld, J., Mallik, C., Martinez, M., Novelli, A., Parchatka, U., Phillips, G. J., Sander, R., Sauvage, C., Schuladen, J., Stöner, C., Tomsche, L., and Williams, J.: Volatile organic compounds (VOCs) in photochemically aged air from the eastern and western Mediterranean, *Atmos. Chem. Phys.*, 17, 9547–9566, <https://doi.org/10.5194/acp-17-9547-2017>, 2017.
- Han, Y., Huang, X., Wang, C., Zhu, B., and He, L.: Characterizing oxygenated volatile organic compounds and their sources in rural atmospheres in China, *J. Environ. Sci.*, 81, 148–155, <https://doi.org/10.1016/j.jes.2019.01.017>, 2019.
- Holst, T., Arneth, A., Hayward, S., Ekberg, A., Mastepanov, M., Jackowicz-Korczynski, M., Friborg, T., Crill, P. M., and Bäckstrand, K.: BVOC ecosystem flux measurements at a high latitude wetland site, *Atmos. Chem. Phys.*, 10, 1617–1634, [doi:10.5194/acp-10-1617-2010](https://doi.org/10.5194/acp-10-1617-2010), 2010.
- Holzinger, R., Jordan, A., Hansel, A., and Lindinger, W.: Methanol measurements in the lower troposphere near Innsbruck (47° 16'N; 11° 24'E), Austria, *Atmos. Environ.*, 35, 2525–2532, 2001.
- Hörtnagl, L., Bamberger, I., Graus, M., Ruuskanen, T. M., Schnitzhofer, R., Müller, M., Hansel, A., Wohlfahrt, G.: Biotic, abiotic, and management controls on methanol exchange above a temperate mountain grassland, *J. Geophys. Res.*, 116 (G3), <https://doi.org/10.1029/2011JG001641>, 2011.
- Jensen, N. R., Gruening, C., Goded, I., Müller, M., Hjorth, J., and Wisthaler, A.: Eddy-covariance flux measurements in an Italian deciduous forest using PTR-ToF-MS, PTR-QMS and FIS, *Int. J. Environ. Anal. Chem.*, 98(8), 758–788, <https://doi.org/10.1080/03067319.2018.1502758>, 2018.
- Jordan, C., Fitz, E., Hagan, T., Sive, B., Frinak, E., Haase, K., Cottrell, L., Buckley, S., and Talbot, R.: Long-term study of VOCs measured with PTR-MS at a rural site in New Hampshire with urban influences, *Atmos. Chem. Phys.*, 9, 4677–4697, <https://doi.org/10.5194/acp-9-4677-2009>, 2009.
- Karl, T., Guenther, A., Spirig, C., Hansel, A., and Fall, R.: Seasonal variation of biogenic VOC emissions above a mixed hardwood in northern Michigan, *Geophys. Res. Lett.*, 30, 2186, [doi:10.1029/2003GL018432](https://doi.org/10.1029/2003GL018432), 2003a.
- Karl, T., Hansel, A., Märk, T., Lindinger, W., and Hoffmann, D.: Trace gas monitoring at the Mauna Loa Baseline Observatory using Proton-Transfer Reaction Mass Spectrometry, *Int. J. Mass. Spec.*, 223–224, 527–538, 2003b.
- Karl, T., Potosnak, M., Guenther, A., Clark, D., Walker, J., Herrick, J. D., and Geron, C.: Exchange processes of volatile organic compounds above a tropical rain forest: Implications for modelling tropospheric chemistry above dense vegetation, *J. Geophys. Res.*, 109, D18306, [doi:10.1029/2004JD004738](https://doi.org/10.1029/2004JD004738), 2004.
- Karl, T., Harley, P., Guenther, A., Rasmussen, R., Baker, B., Jardine, K., and Nemitz, E.: The bi-directional exchange of oxygenated VOCs between a loblolly pine (*Pinus taeda*) plantation and the atmosphere, *Atmos. Chem. Phys.*, 5, 3015–3031, [doi:10.5194/acp-5-3015-2005](https://doi.org/10.5194/acp-5-3015-2005), 2005.
- Karl, T., Guenther, A., Yokelson, R. J., Greenberg, J., Potosnak, M., Blake, D. R., and Artaxo, P.: The tropical forest and fire emissions experiment, Emission, chemistry, and transport of biogenic volatile organic compounds in the lower atmosphere over Amazonia, *J. Geophys. Res.*, 112, D18302, [doi:10.1029/2007JD008539](https://doi.org/10.1029/2007JD008539), 2007.
- Kesselmeier, J., P. Ciccioli, U. Kuhn, P. Stefani, T. Biesenthal, S. Rottenberger, Wolf, A., Vitullo, M., Nobre, A., Kabat, P., and Andreae, M. O.: Volatile organic compound emissions in relation to plant carbon fixation and the terrestrial carbon budget, *Global Biogeochem. Cy.*, 16, <https://doi.org/10.1029/2001GB001813>, 2002.
- Langford, B., Misztal, P. K., Nemitz, E., Davison, B., Helfter, C., Pugh, T. A. M., MacKenzie, A. R., Lim, S. F., and Hewitt, C. N.: Fluxes and concentrations of volatile organic compounds from a South-East Asian tropical rainforest, *Atmos. Chem. Phys.*, 10, 8391–8412, [doi:10.5194/acp-10-8391-2010](https://doi.org/10.5194/acp-10-8391-2010), 2010.
- Lewis, A. C., Hopkins, J. R., Carpenter, L. J., Stanton, J., Read, K. A., and Pilling, M. J.: Sources and sinks of acetone, methanol, and acetaldehyde in North Atlantic marine air, *Atmos. Chem. Phys.*, 5, 1963–1974, <https://doi.org/10.5194/acp-5-1963-2005>, 2005.
- Lewis, A. C., Evans, M. J., Methven, J., Watson, N., Lee, J. D., Hopkins, J. R., Purvis, R. M., Arnold, S. R., McQuaid, J. B., Whalley, L. K., Pilling, M. J., Heard, D. E., Monks, P. S., Parker, A. E., Reeves, C. E., Oram, D. E., Mills, G., Bandy, B. J., Stewart, D., Coe, H., Williams,

- P., Crosier, J.: Chemical composition observed over the mid-Atlantic and the detection of pollution signatures far from source regions, *J. Geophys. Res.*, 112, D10S39, doi:10.1029/2006JD007584, 2007.
- Zhi-Jie Li, Z.-L., He, L.-Y., Ma, H.-N., Peng, X., Tang, M.-X., Du, K., and Huang, X.-F.: Sources of atmospheric oxygenated volatile organic compounds in different air masses in Shenzhen, China, *Environ. Poll.*, 340, 122871, <https://doi.org/10.1016/j.envpol.2023.122871>, 2024.
- Legreid, G., Balzani Lööv, J., Staehelin, J., Hueglin, C., Hill, M., Buchmann, B., Prevot, A. S. H., and Reimann, S.: Oxygenated volatile organic compounds (OVOCs) at an urban background site in Zürich (Europe): Seasonal variation and source allocation, *Atmos. Environ.*, 41, 8409–8423, <https://doi.org/10.1016/j.atmosenv.2007.07.026>, 2007.
- Legreid, G., Folini, D., Staehelin, J., Lööv, J. B., Steinbacher, M. and Reimann, S.: Measurements of organic trace gases including oxygenated volatile organic compounds at the high alpine site Jungfrauoch (Switzerland): Seasonal variation and source allocations, *J. Geophys. Res.* 113 (D5), <https://doi.org/10.1029/2007JD008653>, 2008.
- Lelieveld, J., Butler, T., Crowley, J., Dillon, T. J., Fischer, H., Ganzeveld, L., Harder, H., Lawrence, M. G., Martinez, M., Taraborrelli, D., and Williams, J.: Atmospheric oxidation capacity sustained by a tropical forest, *Nature*, 452, 737–740, <https://doi.org/10.1038/nature06870>, 2008.
- Mao, H., Talbot, R., Nielsen, C., and Sive, B.: Controls on methanol and acetone in marine and continental atmospheres, *Geophys. Res. Lett.*, 33, L02803, doi:10.1029/2005GL024810, 2006.
- McKinney, K. A., Lee, B. H., Vasta, A., Pho, T. V., and Munger, J. W.: Emissions of isoprenoids and oxygenated biogenic volatile organic compounds from a New England mixed forest, *Atmos. Chem. Phys.*, 11, 4807–4831, <https://doi.org/10.5194/acp-11-4807-2011>, 2011.
- Millet, D. B., Goldstein, A. H., Holzinger, R., Allan, J. D., Jimenez, J. L., Worsnop, D. R., Roberts, J. M., White, A. B., Hudman, R. C., Bertschi, I. T., Stohl, A.: Chemical characteristics of North American surface layer outflow: Insights from Chebogue Point, Nova Scotia, *J. Geophys. Res.*, 111, D23S53, <https://doi.org/10.1029/2006JD007287>, 2006.
- Misztal, P., Nemitz, E., Langford, B., Di Marco, C. F., Phillips, G. J., Hewitt, C. N., MacKenzie, A. R., Owen, S. M., Fowler, D., Heal, M. R., and Cape, J. N.: Direct ecosystem fluxes of volatile organic compounds from oil palms in South-East Asia, *Atmos. Chem. Phys.*, 11, 8995–9017, doi:10.5194/acp-11-8995-2011, 2011.
- Patokoski, J., Ruuskanen, T. M., Hellén, H., Taipale, R., Grönholm, T., Kajos, M. J., Petäjä, T., Hakola, H., Kulmala, M., and Rinne, J.: Winter to spring transition and diurnal variation of VOCs in Finland at an urban background site and a rural site, *Bor. Environ. Res.*, 19, 79–103, <https://doi.org/10.60910/79ew-2erz>, 2014.
- Paton-Walsh, C., Guérette, É.-A., Kubistin, D., Humphries, R., Wilson, S. R., Dominick, D., Galbally, I., Buchholz, R., Bhujel, M., Chambers, S., Cheng, M., Cope, M., Davy, P., Emmerson, K., Griffith, D. W. T., Griffiths, A., Keywood, M., Lawson, S., Molloy, S., Rea, G., Selleck, P., Shi, X., Simmons, J., and Velazco, V.: The MUMBA campaign: measurements of urban, marine and biogenic air, *Earth Syst. Sci. Data*, 9, 349–362, <https://doi.org/10.5194/essd-9-349-2017>, 2017.
- Rantala, P., Aalto, J., Taipale, R., Ruuskanen, T., and Rinne, J.: Annual cycle of volatile organic compound exchange between a boreal pine forest and the atmosphere, *Biogeosciences*, 12, 5723–5770, doi:10.5194/bg-12-5753-2015, 2015.
- Read, K. A., Carpenter, L. J., Arnold, S. R., Beale, R., Nightingale, P. D., Hopkins, J. R., Lewis, A. C., Lee, J. D., Mendes, L., and Pickering, S. J.: Multiannual observations of acetone, methanol, and acetaldehyde in remote tropical Atlantic air: Implications for atmospheric OVOC budgets and oxidative capacity, *Environ. Sci. Technol.*, 46, 20, 11028–11039, <https://doi.org/10.1021/es302082p>, 2012.
- Rinsland, C. P., Mahieu, E., Chiou, L., and Herbin, H.: First ground-based infrared solar absorption measurements of free tropospheric methanol (CH<sub>3</sub>OH): Multidecade infrared time series from Kitt Peak (31.9°N 111.6°W): Trend, seasonal cycle, and comparison with previous measurements, *J. Geophys. Res.*, 114, D04309, <https://doi.org/10.1029/2008JD011003>, 2009.
- Sanhueza, E., Holzinger, R., Donoso, L., Santana, M., Fernandez, E., and Romero, J.: Compuestos organicos volatiles en la atmosfera Gran Sabana, concentraciones y quimica atmosferica, *Interciencia*, 26, 597–605, 2001.
- Schade, G. W. and Goldstein, A. H.: Fluxes of oxygenated volatile organic compounds from a ponderosa pine plantation, *J. Geophys. Res.*, 106(D3), 3111–3123, <https://doi.org/10.1029/2000JD900592>, 2001.
- Schade, G. W. and Goldstein, A. H.: Seasonal measurements of acetone and methanol: abundances and implications for atmospheric budgets, *Global Biogeochem. Cy.*, 20, GB1011, <https://doi.org/10.1029/2005GB002566>, 2006.
- Schade, G. W., Solomon, S. J., Dellwik, E., Pilegaard, K., and Ladstätter-Weissenmayer, A.: Methanol and other VOC fluxes from a Danish beech forest during late springtime, *Biogeochemistry*, 106, 337–335, <https://doi.org/10.1007/s10533-010-9515-5>, 2011.
- Schallhart, S., Rantala, P., Nemitz, E., Taipale, D., Tillmann, R., Mentel, T. F., Loubet, B., Gerosa, G., Finco, A., Rinne, J., and Ruuskanen, T. M.: Characterization of total ecosystem-scale biogenic VOC exchange at a Mediterranean oak-hornbeam forest, *Atmos. Chem. Phys.*, 16, 7171–7194, doi:10.5194/acp-16-7171-2016, 2016.
- Seco, R., Peñuelas, J., Filella, I., Llusà, J., Molowny-Horas, R., Schallhart, S., Metzger, A., Müller, M., and Hansel, A.: Contrasting winter and summer VOC mixing ratios at a forest site in the Western Mediterranean Basin: the effect of local biogenic emissions, *Atmos. Chem. Phys.*, 11, 13161–13179, <https://doi.org/10.5194/acp-11-13161-2011>, 2011.
- Seco, R., et al.: GOAMAZON 2014/15 campaign: SRI-PTR-TOF-MS VOC data from the T3 site in Manacapuru (Amazonas, Brasil). Dataset available at : [https://adc.arm.gov/discovery/#/results/id:6653\\_voc\\_microchem\\_ptrms\\_aerosol\\_voc](https://adc.arm.gov/discovery/#/results/id:6653_voc_microchem_ptrms_aerosol_voc)
- Seco, R., Karl, T., Guenther, A., Hosman, K. P., Pallardy, S. P., Gu, L., Geron, C., Harley, P., and Kim, S.: Ecosystem-scale volatile organic compound fluxes during an extreme drought in a broadleaf temperate forest of the Missouri Ozarks (central USA), *Glob. Chang. Biol.*, 21 (10), 3657–3674, <https://doi.org/10.1111/gcb.12980>, 2015.

- Sinha, V., Williams, J., Meyerhöfer, M., Riebesell, U., Paulino, A. I., and Larsen, A.: Air-sea fluxes of methanol, acetone, acetaldehyde, isoprene and DMS from a Norwegian fjord following a phytoplankton bloom in a mesocosm experiment, *Atmos. Chem. Phys.*, 7, 739–755, doi:10.5194/acp-7-739-2007, 2007.
- Solomon, S. J., Custer, T., Schade, G., Soares Dias, A. P., and Burrows, J.: Atmospheric methanol measurement using selective catalytic methanol to formaldehyde conversion, *Atmos. Chem. Phys.*, 5, 2787–2796, doi:10.5194/acp-5-2787-2005, 2005.
- Spirig, C., Neftel, A., Ammann, C., Dommen, J., Grabmer, W., Thielmann, A., Schaub, A., Beauchamp, J., Wisthaler, A., and Hansel, A.: Eddy covariance flux measurements of biogenic VOCs during ECHO 2003 using proton transfer reaction mass spectrometry, *Atmos. Chem. Phys.*, 5, 465–481, <https://doi.org/10.5194/acp-5-465-2005>, 2005.
- Verreyken, B., Amelynck, C., Schoon, N., Müller, J.-F., Brioude, J., Kumps, N., Hermans, C., Metzger, J.-M., Colomb, A., and Stavrakou, T.: Measurement report: Source apportionment of volatile organic compounds at the remote high-altitude Maïdo observatory, *Atmos. Chem. Phys.*, 21, 12965–12988, <https://doi.org/10.5194/acp-21-12965-2021>, 2021.
- Viatte, C., Strong, K., Walker, K. A., and Drummond, J. R.: Five years of CO, HCN, C<sub>2</sub>H<sub>6</sub>, C<sub>2</sub>H<sub>2</sub>, CH<sub>3</sub>OH, HCOOH and H<sub>2</sub>CO total columns measured in the Canadian high Arctic, *Atmos. Meas. Tech.*, 7, 1547–1570, <https://doi.org/10.5194/amt-7-1547-2014>, 2014.
- Vigouroux, C., Stavrakou, T., Whaley, C., Dils, B., Duflo, V., Hermans, C., Kumps, N., Metzger, J.-M., Scolas, F., Vanhaelewyn, G., Müller, J.-F., Jones, D. B. A., Li, Q., and De Mazière, M.: FTIR time-series of biomass burning products (HCN, C<sub>2</sub>H<sub>6</sub>, C<sub>2</sub>H<sub>2</sub>, CH<sub>3</sub>OH, and HCOOH) at Reunion Island (21° S, 55° E) and comparisons with model data, *Atmos. Chem. Phys.*, 12, 10367–10385, <https://doi.org/10.5194/acp-12-10367-2012>, 2012.
- Williams, J., Pöschl, U., Crutzen, P. J., Hansel, A., Holzinger, R., Warneke, C., Lindinger, W., and Lelieveld, J.: An atmospheric Chemistry interpretation of mass scans obtained from a proton transfer mass spectrometer flown over the tropical rainforest of Suriname, *J. Atmos. Chem.*, 38, 133–166, 2001.
- Williams, J., R. Holzinger, V. Gros, X. Xu, E. Atlas, and D. W. R. Wallace: Measurements of organic species in air and seawater from the tropical Atlantic, *Geophys. Res. Lett.* 31, <https://doi.org/10.1029/2004GL020012>, 2004.
- Wisthaler, A., Hansel, A., Dickerson, R. R., and Crutzen, P. J.: Organic trace gas measurements by PTR-MS during INDOEX 1999, *J. Geophys. Res.*, 107(D19), 8024, doi:10.1029/2001JD000576, 2002.
- Wizenberg, T., Strong, K., Jones, D. B. A., Hannigan, J. W., Ortega, I., and Mahieu, E.: Measured and modeled trends of seven tropospheric pollutants in the high Arctic from 1999 to 2022, *J. Geophys. Res.*, 129, e2023JD040544, <https://doi.org/10.1029/2023JD040544>, 2024.
- Wohlfahrt, G., Amelynck, C., Ammann, C., Arneth, A., Bamberger, I., Goldstein, A. H., Gu, L., Guenther, A., Hansel, A., Heinesch, B., Holst, T., H<sup>o</sup>rtnagel, L., Karl, T., Laffineur, Q., Neftel, A., McKiney, K., Munger, J. W., Pallardy, S. G., Schade, G. W., Seco, R., and Schoon, N.: An ecosystem-scale perspective of the net land methanol flux: synthesis of micrometeorological flux measurements, *Atmos. Chem. Phys.*, 15, 7413–7427, <https://doi.org/10.5194/acp-15-7413-2015>, 2015.
- Yamanouchi, S., Strong, K., Lutsch, E., and Jones, D. B. A.: Detection of HCOOH, CH<sub>3</sub>OH, CO, HCN, and C<sub>2</sub>H<sub>6</sub> in wildfire plumes transported over Toronto using ground-based FTIR measurements from 2002–2018, *J. Geophys. Res.*, 125, e2019JD031924, <https://doi.org/10.1029/2019JD031924>, 2020.
- Yamanouchi, S., Conway, S., Strong, K., Colebatch, O., Lutsch, E., Roche, S., Taylor, J., Whaley, C. H., and Wiacek, A.: Network for the Detection of Atmospheric Composition Change (NDACC) Fourier transform infrared (FTIR) trace gas measurements at the University of Toronto Atmospheric Observatory from 2002 to 2020, *Earth Syst. Sci. Data*, 15, 3387–3418, <https://doi.org/10.5194/essd-15-3387-2023>, 2023.
- Yáñez-Serrano, A. M., Bach, A., Bartolomé-Català, Matthaios, V., Seco, R., Llusà, J., Filella, I., Peñuelas, J.: Dynamics of volatile organic compounds in a western Mediterranean oak forest, *Atmos. Environ.* 257, 118447, <https://doi.org/10.1016/j.atmosenv.2021.118447>, 2021.
